# Supplementary material for: Detection of CTNNB1 Hotspot Mutations in Cell-Free DNA from the Urine of Hepatocellular Carcinoma Patients
Source: MDPI journal article supplement (doi:10.3390/diagnostics11081475), 2021-08-14
Supplement: s1 [file s1]

**Supplemental Table S1. Frequency of *CTNNB1* mutation in exon 3.**

| Reference Data                                                  | CTNNB1 exon 3 codons (number of occurrences listed from each reference) |     |      |      |     |     |     |      |     |     |     |      |     |     |     |      |     |     |     |     |     |     |     |     |     |     |     |     |     |     |           |            |
|-----------------------------------------------------------------|-------------------------------------------------------------------------|-----|------|------|-----|-----|-----|------|-----|-----|-----|------|-----|-----|-----|------|-----|-----|-----|-----|-----|-----|-----|-----|-----|-----|-----|-----|-----|-----|-----------|------------|
|                                                                 | 23                                                                      | 31  | 32   | 33   | 34  | 35  | 36  | 37   | 38  | 39  | 40  | 41   | 42  | 43  | 44  | 45   | 46  | 52  | 55  | 69  | 136 | 185 | 333 | 335 | 338 | 368 | 383 | 387 | 405 | 757 | Deletions | Insertions |
| Cbiportal.org                                                   |                                                                         | 1   | 22   | 19   | 6   | 0   | 5   | 11   | 0   | 0   | 0   | 12   | 0   | 0   | 0   | 10   | 1   |     | 1   |     | 1   | 1   | 1   | 8   | 1   | 1   | 2   | 4   | 1   | 1   | 4         | 1          |
| Ding, X., et al. <i>PLoS One</i> . 2014                         |                                                                         |     | 2    |      | 3   |     |     | 3    |     |     |     | 5    |     |     |     | 2    |     |     |     |     |     |     |     |     |     |     |     |     |     | 0   | 0         |            |
| Taniguchi, K., et al. <i>Oncogene</i> . 2002                    |                                                                         |     | 1    | 1    | 2   |     |     |      |     |     |     | 1    |     |     |     | 8    |     |     |     |     |     |     |     |     |     |     |     |     |     | 1   | 1         |            |
| Chun M. Wong, C.M., et al. <i>Cancer</i> . 2001                 |                                                                         |     |      |      | 1   | 1   | 1   |      |     |     |     | 1    |     |     |     | 2    |     |     |     |     |     |     |     |     |     |     |     |     |     | 1   | 0         |            |
| Laurent-puig, P., et al. <i>Gastroenterology</i> . 2001         | 1                                                                       |     | 2    | 4    | 2   | 1   | 1   | 2    |     |     |     | 5    |     |     |     | 10   |     |     |     |     |     |     |     |     |     |     |     |     |     | 2   | 0         |            |
| Li-Chun, L., et al. <i>Oncology</i> . 2014                      | 1                                                                       | 1   | 3    | 2    | 3   |     |     | 1    |     |     |     | 2    | 1   |     |     | 1    |     |     |     |     |     |     |     |     |     |     |     |     |     | 0   | 0         |            |
| Galy, O., et al. <i>Hepatitis Research and Treatment</i> . 2011 |                                                                         |     |      | 2    |     |     |     | 2    |     |     |     | 2    |     |     |     |      |     |     |     |     |     |     |     |     |     |     |     |     |     |     | 0         | 0          |
| Madeleine A., et al. <i>Molecular Cancer</i> . 2008             |                                                                         |     |      | 1    |     | 1   | 1   | 2    |     |     |     | 2    |     |     | 1   | 2    |     |     |     |     |     |     |     |     |     |     |     |     |     | 0   | 0         |            |
| Huang, H., et al. <i>Am J Path</i> . 1999                       |                                                                         |     | 3    | 1    |     |     |     | 3    |     |     |     |      |     |     |     | 2    |     |     |     |     |     |     |     |     |     |     |     |     |     | 0   | 0         |            |
| Legoix, P., et al. <i>Oncogene</i> . 1999                       |                                                                         |     | 3    | 3    | 1   | 1   |     | 1    |     |     |     | 4    |     |     |     | 8    |     |     |     |     |     |     |     |     |     |     |     |     |     | 2   | 0         |            |
| Nhieu, JTV., et al. <i>Am J Pathol</i> . 1999                   |                                                                         |     | 1    | 1    | 2   |     | 1   |      |     |     | 1   | 2    |     |     |     | 1    |     |     |     |     |     |     |     |     |     |     |     |     |     | 2   | 0         |            |
| Terris B., et al. <i>Oncogene</i> . 1999                        |                                                                         |     | 3    | 3    | 1   |     |     | 1    |     |     |     |      |     |     |     | 2    |     |     |     |     |     |     |     |     |     |     |     |     |     | 5   | 0         |            |
| % Frequency of mutation out of compiled reference data          | 0.8                                                                     | 0.8 | 15.9 | 14.7 | 8.4 | 1.6 | 3.6 | 10.4 | 0.0 | 0.0 | 0.4 | 14.3 | 0.4 | 0.0 | 0.4 | 19.1 | 0.4 | 0.0 | 0.4 | 0.0 | 0.4 | 0.4 | 0.4 | 3.2 | 0.4 | 0.4 | 0.8 | 1.6 | 0.4 | 0.4 |           |            |
| Total number of mutations out of compiled reference data        | 2                                                                       | 2   | 40   | 37   | 21  | 4   | 9   | 26   | 0   | 0   | 1   | 36   | 1   | 0   | 1   | 48   | 1   | 0   | 1   | 0   | 1   | 1   | 1   | 8   | 1   | 1   | 2   | 4   | 1   | 1   | 17        | 2          |
| Summary of compiled reference data                              |                                                                         |     |      |      |     |     |     |      |     |     |     |      |     |     |     |      |     |     |     |     |     |     |     |     |     |     |     |     |     |     |           |            |
| Total hotspot mutations region 1 (32-37)                        | 137                                                                     |     |      |      |     |     |     |      |     |     |     |      |     |     |     |      |     |     |     |     |     |     |     |     |     |     |     |     |     |     |           |            |
| Total hotspot mutations region 2 (41-45)                        | 86                                                                      |     |      |      |     |     |     |      |     |     |     |      |     |     |     |      |     |     |     |     |     |     |     |     |     |     |     |     |     |     |           |            |
| Total non-hotspot mutations                                     | 28                                                                      |     |      |      |     |     |     |      |     |     |     |      |     |     |     |      |     |     |     |     |     |     |     |     |     |     |     |     |     |     |           |            |
| Total number of overall mutations                               | 251                                                                     |     |      |      |     |     |     |      |     |     |     |      |     |     |     |      |     |     |     |     |     |     |     |     |     |     |     |     |     |     |           |            |
| % Hotspot region 1                                              | 54.6                                                                    |     |      |      |     |     |     |      |     |     |     |      |     |     |     |      |     |     |     |     |     |     |     |     |     |     |     |     |     |     |           |            |
| % Hotspot region 2                                              | 34.3                                                                    |     |      |      |     |     |     |      |     |     |     |      |     |     |     |      |     |     |     |     |     |     |     |     |     |     |     |     |     |     |           |            |
| % Hotspot region 1 and 2                                        | 88.8                                                                    |     |      |      |     |     |     |      |     |     |     |      |     |     |     |      |     |     |     |     |     |     |     |     |     |     |     |     |     |     |           |            |

\*Entire data analysis was compiled from data in reports listed above.

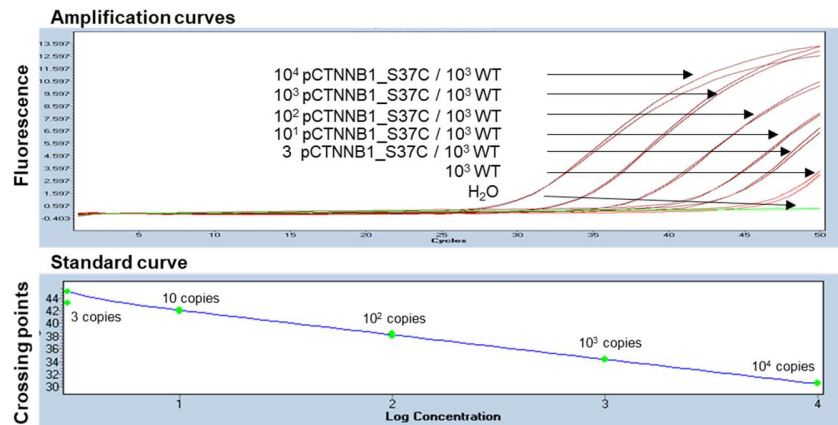

**Supplemental Figure S1.** Amplification curves of spiked-in standards and controls in the BNA<sup>NC</sup>[NMe] clamp-mediated *CTNNB1* 32-37 mutation qPCR assay. The curves were generated with varying dilutions of the pCTNNB1\_S37C plasmid as described in the Materials and Methods section. The analysis was carried out using the Roche LightCycler® 480 software.

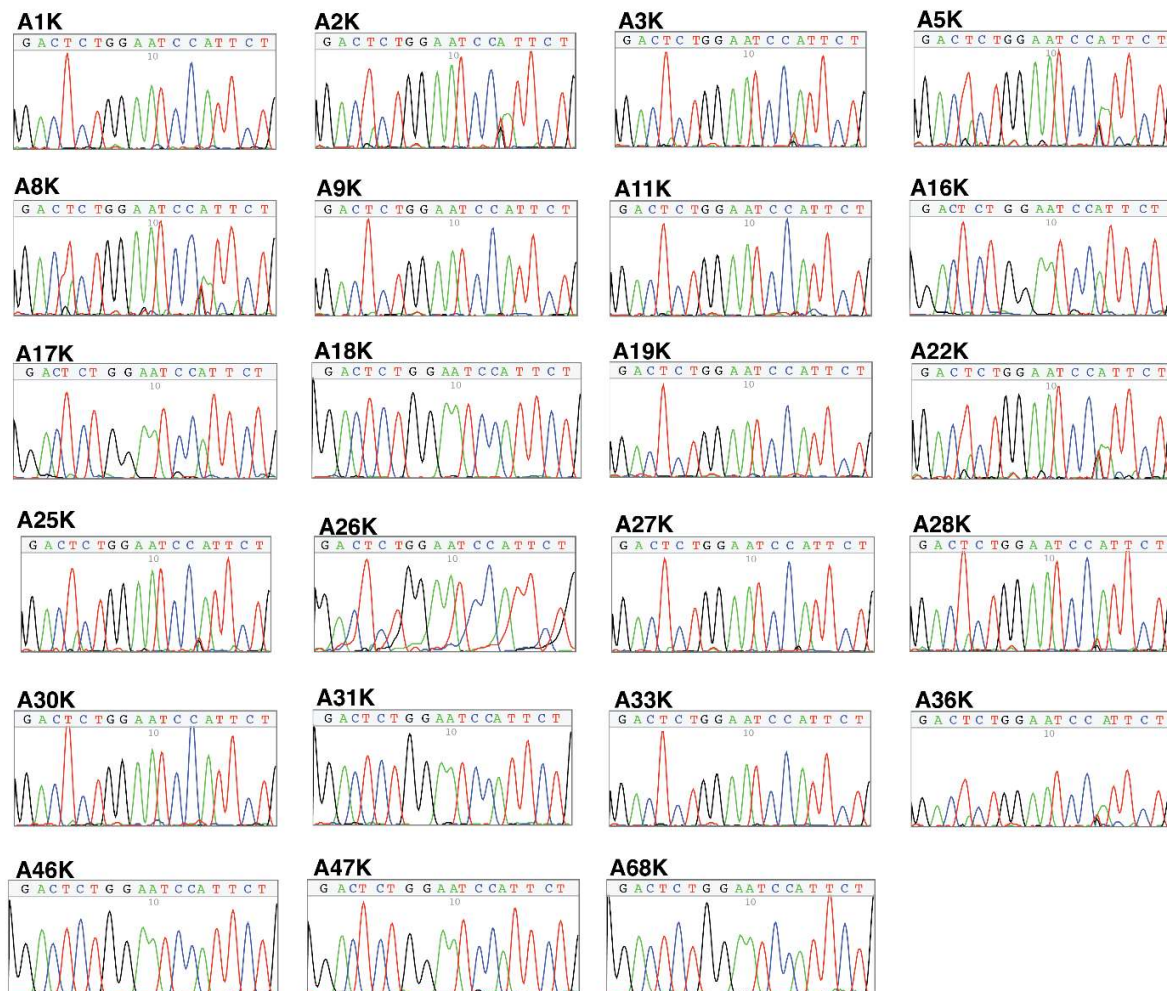

**Supplemental Figure S2. DNA sequencing of HCC tissue samples negative for *CTNNB1* mutation.** A subset of the samples that tested negative for *CTNNB1* mutations (23/55) were amplified with *CTNNB1*-hotspot-specific primers to generate a 213 bp product that was submitted for sequencing. The electropherograms depict the region of interest, codons 32-37 of exon 3 of the *CTNNB1* gene.
